# Supplementary material for: Excess enthalpy of mixing of mineral solid solutions derived from density-functional calculations
Source: PubMed Central journal article supplement (PMC7024695; doi:10.1007/s00269-020-01085-8), 2020-02-17

Appendix A:

NaCl – KCl solid solution:

Margules parameters ( $W$ ) as a function of the distance between single defects in neighbouring cells from the study "Excess enthalpy of mixing of mineral solid solutions derived from density-functional calculations" published by Artur Benisek and Edgar Dachs in Physics and Chemistry of Minerals.

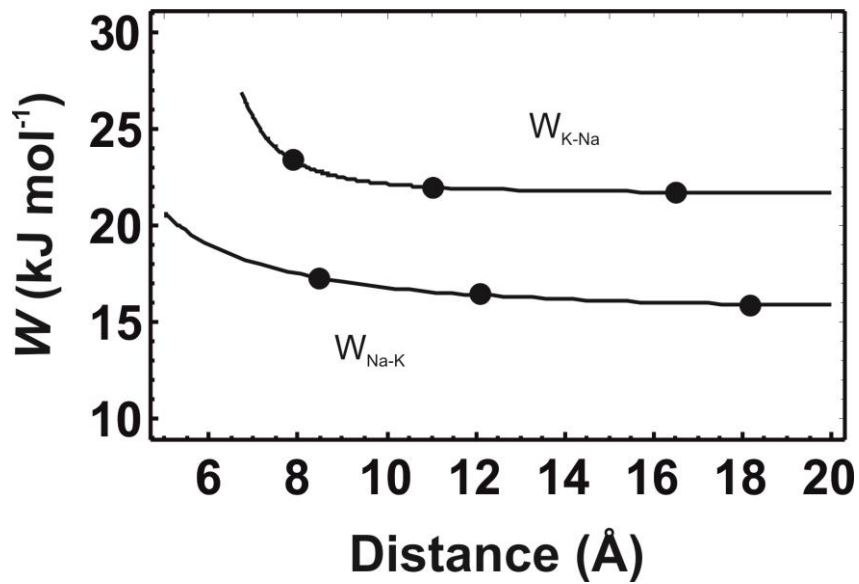

Supplement: 269_2020_1085_MOESM1_ESM.pdf [file 269_2020_1085_MOESM1_ESM.pdf]
